# Supplementary material for: Enhanced photoelectrochemical activity of Co-doped β-In2S3nanoflakes as photoanodes for water splitting
Source: Royal Society of Chemistry journal article supplement (doi:10.1039/c8ra09660k), 2019-01-01
Supplement: c8ra09660k1.pdf [file c8ra09660k1.pdf]

Table 1: Calculated surface area, single pore volume and pore radius for all the as-synthesized samples.

| Sample                                 | Single point S/A               | Single Pore volume (cc/g)       | Pore diameter( $\text{\AA}$ ) |
|----------------------------------------|--------------------------------|---------------------------------|-------------------------------|
| $\beta\text{-In}_2\text{S}_3$          | 52.1775 $\text{m}^2/\text{g}$  | 0.125958 $\text{cm}^3/\text{g}$ | 101.939 $\text{\AA}$          |
| Co-doped $\beta\text{-In}_2\text{S}_3$ | 102.1553 $\text{m}^2/\text{g}$ | 0.266258 $\text{cm}^3/\text{g}$ | 95.507 $\text{\AA}$           |

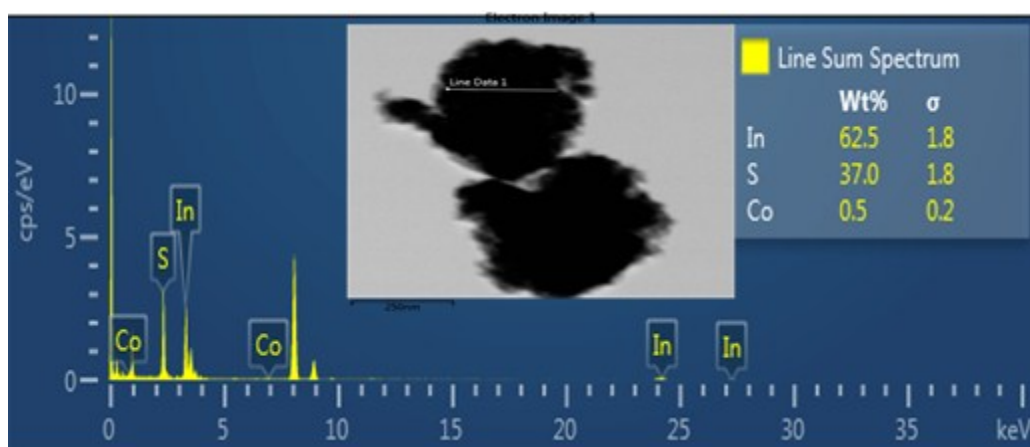

Figure S1: Line scan of a Co-doped  $\beta\text{-In}_2\text{S}_3$  indicating cobalt presence in the doped sample.
